# Supplementary material for: Characterization of Mixed-Species Biofilm Formed by Vibrio parahaemolyticus and Listeria monocytogenes
Source: PubMed Central journal article supplement (PMC6856058; doi:10.3389/fmicb.2019.02543), 2019-11-08
Supplement: Data_Sheet_1.pdf [file Data_Sheet_1.pdf]

# Characterization of mixed-species biofilm formed by *Vibrio parahaemolyticus* and *Listeria monocytogenes*

Ping Chen<sup>1</sup>, Jingjing Wang<sup>1,2,3</sup>, Bin Hong<sup>1</sup>, Ling Tan<sup>1</sup>, Jun Yan<sup>1,2,3</sup>, Zhaohuan Zhang<sup>1</sup>, Haiquan Liu<sup>1,2,3,4</sup>, Yingjie Pan<sup>1,2,3</sup>, Yong Zhao<sup>1,2,3\*</sup>

<sup>1</sup> College of Food Science and Technology, Shanghai Ocean University, Shanghai 201306, China;

<sup>2</sup> Shanghai Engineering Research Center of Aquatic Product Processing & Preservation, Shanghai 201306, China;

<sup>3</sup> Laboratory of Quality & Safety Risk Assessment for Aquatic Products on Storage and Preservation (Shanghai), Ministry of Agriculture, Shanghai 201306, China;

<sup>4</sup> Engineering Research Center of Food Thermal-processing Technology, Shanghai Ocean University, Shanghai 201306, China;

Corresponding author: Tel/fax: +86 21 6190 0503; E-mail: [yzhao@shou.edu.cn](mailto:yzhao@shou.edu.cn) (Yong Zhao).

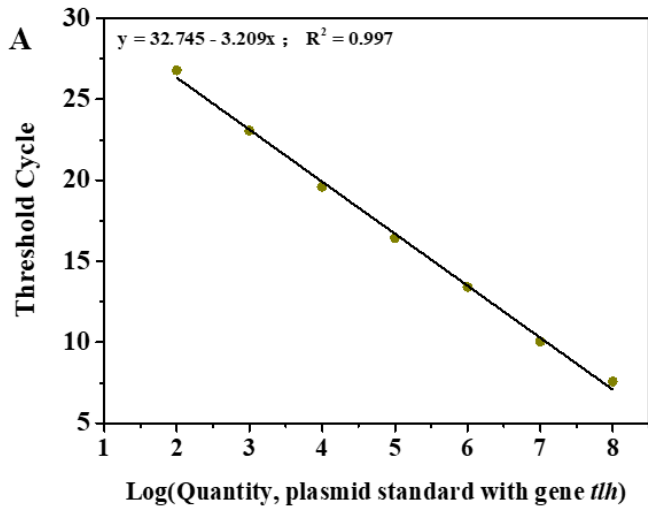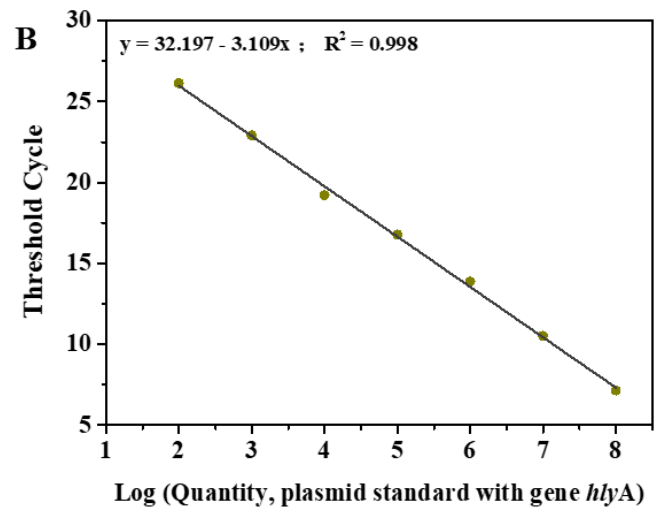

**FIGURE S1: Standard curves for real-time qPCR in pure culture.** **A:** Standard curves for *V. parahaemolyticus* based on plasmid standard with *tlh*. **B:** Standard curves for *L. monocytogenes* based on plasmid standard with *hlyA*.

**Table S1 | Primer sequences for the RT-qPCR assay**

| <b>Target gene</b> | <b>Nucleotide sequence<br/>(5'→3')</b>                   | <b>Reference</b>           |
|--------------------|----------------------------------------------------------|----------------------------|
| <i>recA</i>        | F - GCTAGTAGAAAAAGCGGGTG<br>R - ATACGAGTGGTTGCTGTCATG    | Ma et al., 2015            |
| <i>mshA</i>        | F - GGTTTCGTTTAGGTCACG<br>R - CGTCGAAATGTCGGCGG          | Shime-Hattori et al., 2006 |
| <i>aphA</i>        | F - ACACCCAACCGTTCGTGATG<br>R - GTTGAAGGCGTTGCGTAGTAAG   | Wang et al., 2013          |
| <i>opaR</i>        | F - TGTCTACCAACCGCACTAACC<br>R - GCTCTTCAACTCGGCTTCAC    | Zhang et al., 2016         |
| <i>oxyR</i>        | F - TCGTCAGCTAGAGGAAGG<br>R - TGGTCGCGTAAGCAATGC         | Chung et al., 2016         |
| <i>Gap</i>         | F-AAAGCTGGCGCTAAAAAAGTTG<br>R-TTCATGGTTTACATTGTAAACGATTG | Mattila et al., 2011       |
| <i>flaE</i>        | F - CAGCAGGTTCCCCGACTTC<br>R - CGGCCTTGTAGTGCTGCAT       | This study                 |
| <i>motB</i>        | F - TGCAAAAAAATTCGAACAAATGG<br>R - CTGCCGCGCCTTCCT       | This study                 |
| <i>degU</i>        | F - GGAGGAGTAGTCATTATGGC<br>R - ACTTCTGGTTGTTGGTAGCC     | This study                 |
| <i>flaA</i>        | F - GAAGGCATGACTCAAGCGCA<br>R - GCAAGACCAGCAGCGTCATC     | This study                 |

## REFERENCES

- Chung, C.H., Fen, S.Y., Yu, S.C., and Wong, H.C. (2016). Influence of oxyR on Growth, Biofilm Formation, and Mobility of *Vibrio parahaemolyticus*. *Applied and Environmental Microbiology* 82(3), 788-796. doi: 10.1128/AEM.02818-15
- Ma, Y.J., Sun, X.H., Xu, X.Y., Zhao, Y., Pan, Y.J., Hwang, C.A., et al. (2015). Investigation of Reference Genes in *Vibrio parahaemolyticus* for Gene Expression Analysis Using Quantitative RT-PCR. *Plos One* 10(12), e0144362. doi: 10.1371/journal.pone.0144362
- Mattila, M., Lindström, M., Somervuo, P., Markkula, A., and Korkeala, H. (2011). Role of flhA and motA in growth of *Listeria monocytogenes* at low temperatures. *International Journal of Food Microbiology* 148(3), 177-183. doi: 10.1016/j.ijfoodmicro.2011.05.022
- Shime-Hattori, A., Iida, T., Arita, M., Park, K.S., Kodama, T., and Honda, T. (2006). Two type IV pili of *Vibrio parahaemolyticus* play different roles in biofilm formation. *Fems Microbiology Letters* 264(1), 89-97. doi: 10.1111/j.1574-6968.2006.00438.x
- Wang, L., Ling, Y., Jiang, H.W., Qiu, Y.F., Qiu, J.F., Chen, H.P., et al. (2013). AphA is required for biofilm formation, motility, and virulence in pandemic *Vibrio parahaemolyticus*. *International Journal of Food Microbiology* 160(3), 245-251. doi: 10.1016/j.ijfoodmicro.2012.11.004
- Zhang, Y.Q., Zhang, L.Y., Hou, S.N., Huang, X.X., Sun, F.J., and Gao, H. (2016). The Master Quorum-Sensing Regulator OpaR is Activated Indirectly by H-NS in *Vibrio parahaemolyticus*. *Current Microbiology* 73(1), 71-76. doi: 10.1007/s00284-016-1018-8
